# Supplementary material for: Layer-by-layer assembly of chitosan/tungstosilicate acid-Ag nanocomplex with electrocatalytic properties
Source: Royal Society of Chemistry journal article supplement (doi:10.1039/b817071a), 2009-01-01
Supplement: b817071a.pdf [file b817071a.pdf]

## Layer-by-Layer Assembly of Chitosan/Tungstosilicate Acid -Ag Nanocomplex with Electrocatalytic Properties

L. Zhang <sup>a,b</sup>, Y.H. Shen <sup>a,c\*</sup>, A.J. Xie <sup>a,c</sup>, S.K. Li <sup>a</sup>, Y.M. Li <sup>a</sup>

<sup>a</sup>*School of Chemistry and Chemical Engineering, Anhui University, Hefei 230039, P.  
R. China*

<sup>b</sup>*Department of Chemistry-Biology, Suzhou University, Suzhou 234000, P. R. China*

<sup>c</sup>*State Key Laboratory of Coordination Chemistry, Nanjing University, Nanjing 210093, P. R.  
China*

AUTHOR EMAIL ADDRESS: s\_yuhua@163.com.

### Supporting Information

Figure S1. FESEM images of surface with low magnifications of {CTS/TSA-Ag}<sub>1</sub> (a)  
and {CTS/TSA-Ag}<sub>6</sub> ( b ) multilayer films

Figure S2. The raw format of thickness of 2 (a) and 4 (b) layers of {CTS/TSA-Ag}  
multilayer films

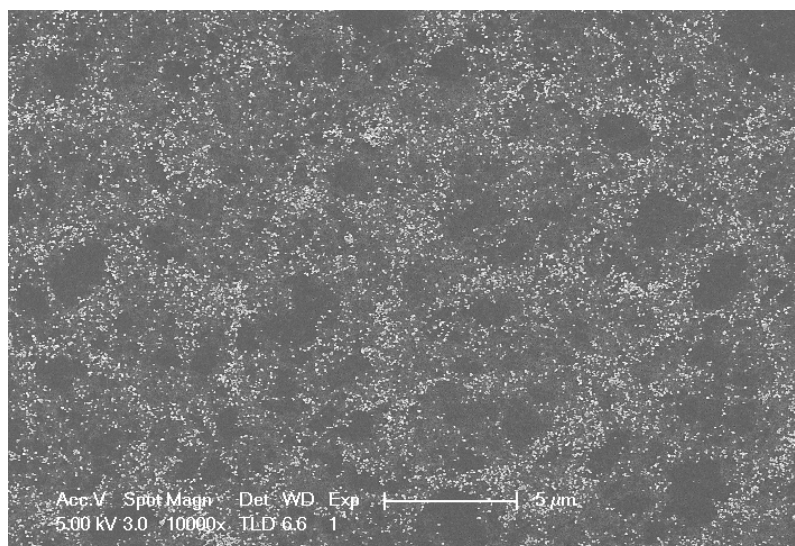

---

\* To whom correspondence should be addressed. Tel.: +86-551-5108090. Fax: +86-551-5108702.  
E-mail: s\_yuhua@163.com.

(a)

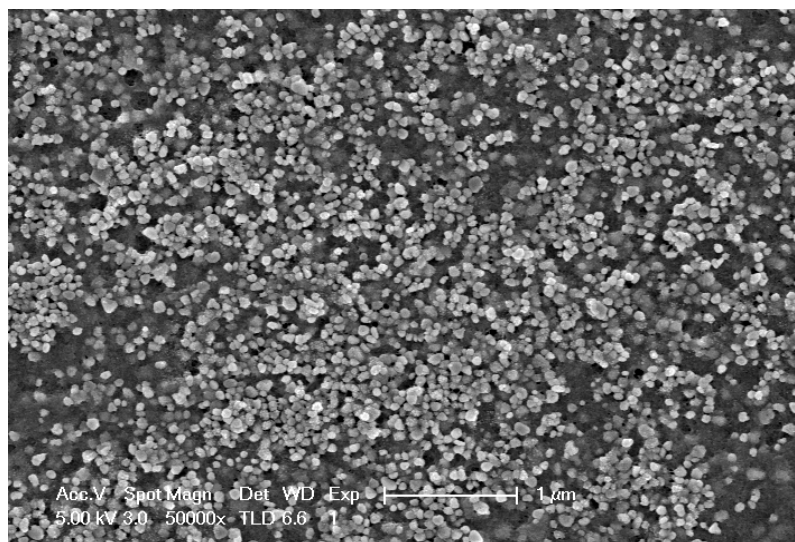

(b)

Figure S1. FESEM images of surface with low magnifications of {CTS/TSA-Ag}<sub>1</sub>  
(a) and {CTS/TSA-Ag}<sub>6</sub> ( b ) multilayer films

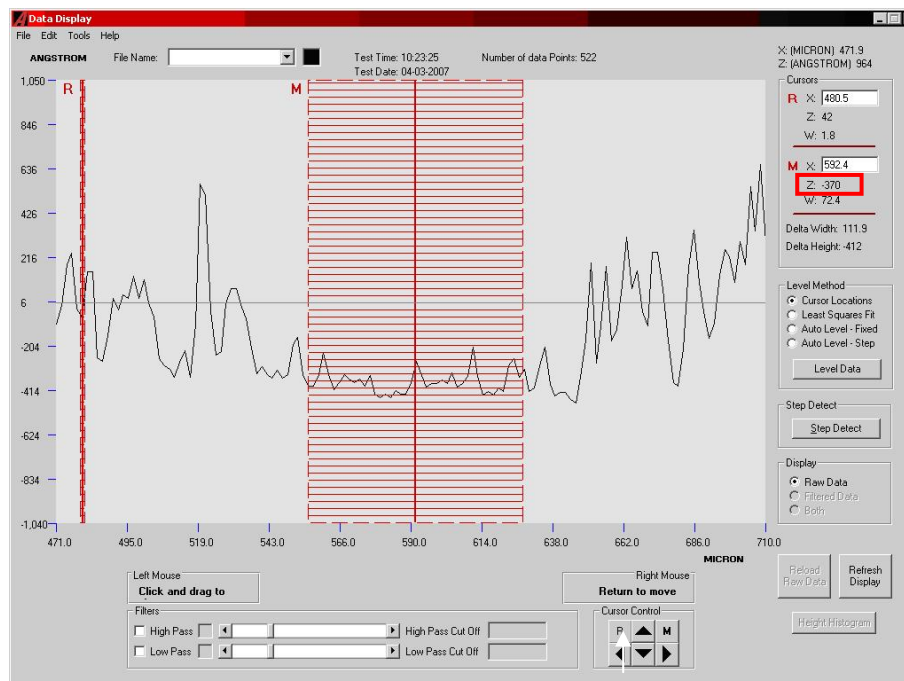

(a)

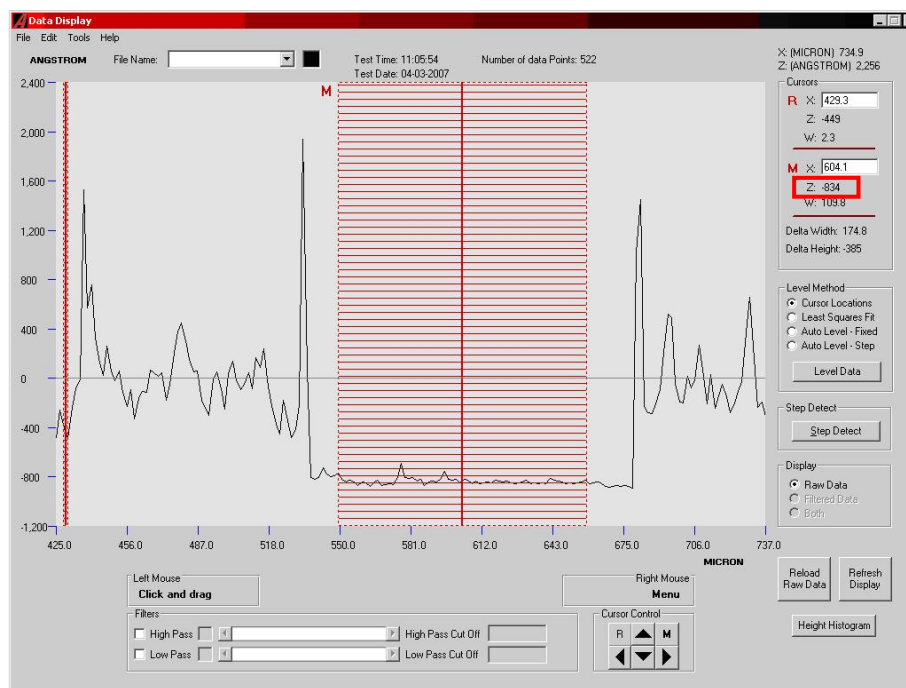

(b)

Figure S2. The raw format of thickness of 2 (a) and 4 (b) layers of {CTS/TSA-Ag} multilayer films
